# Supplementary material
Source: PubMed Central journal article supplement (PMC2922130)
Supplement: 1007140107_pnas.1007140107_SI.pdf [file 1007140107_pnas.1007140107_SI.pdf]

# Supporting Information

Blum et al. 10.1073/pnas.1007140107

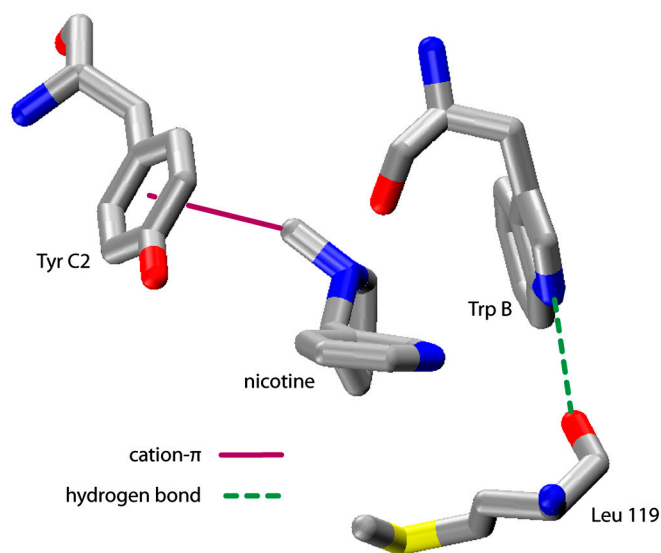

Fig. S1. Additional interactions seen in the crystal structure of nicotine bound to acetylcholine binding protein (PDB ID code 1UW6). Residue numbering is for the  $\alpha 4\beta 2$  receptor.
